# Supplementary material for: Position-dependent rates of film growth in drying colloidal suspensions on tilted air–water interfaces
Source: Royal Society of Chemistry journal article supplement (doi:10.1039/d3cp00966a), 2023-01-01
Supplement: d3cp00966a1.pdf [file d3cp00966a1.pdf]

**Position-dependent rates of film growth in drying colloidal suspensions on tilted air-water interfaces**

Kohei Abe <sup>\*,a</sup> and Susumu Inasawa <sup>\*,a,b</sup>

<sup>a</sup>*Graduate School of Bio-Application and Systems Engineering, Tokyo University of Agriculture and Technology, 2-24-16 Naka-Cho, Koganei, Tokyo, 184-8588, Japan.*

<sup>b</sup>*Department of Applied Physics and Chemical Engineering, Tokyo University of Agriculture and Technology, 2-24-16 Naka-Cho, Koganei, Tokyo, 184-8588, Japan.*

\*E-mail: [kohei.abe@oist.jp](mailto:kohei.abe@oist.jp) and [inasawa@cc.tuat.ac.jp](mailto:inasawa@cc.tuat.ac.jp)

Table S1 List of  $A$  for various conditions for which  $H$ ,  $T$ , suspension (particle diameter  $d$ ), or  $\varphi_0$  is changed.

For all of the drying experiments,  $W$  and  $\theta_0$  are equally set to be approximately 5 mm and 45°, respectively

|                    | Suspension | $H$ [mm] | $T$ [°C] | $\varphi_0$ [-] | $A$ [-] |
|--------------------|------------|----------|----------|-----------------|---------|
| Standard condition | KE-W30     | 0.1      | 20       | 0.10            | 2.1     |
|                    | KE-W30     | 0.05     | 20       | 0.10            | 2.1     |
|                    | KE-W30     | 0.2      | 20       | 0.10            | 2.1     |
|                    | KE-W30     | 0.1      | 5        | 0.10            | 2.7     |
|                    | KE-W30     | 0.1      | 40       | 0.10            | 2.1     |
|                    | Snowtex-OL | 0.1      | 20       | 0.11            | 2.7     |
|                    | KE-W10     | 0.1      | 20       | 0.09            | 2.1     |
|                    | MP-2040    | 0.1      | 20       | 0.25            | 2.9     |
|                    | KE-W30     | 0.1      | 20       | 0.033           | 2.9     |
|                    | KE-W30     | 0.1      | 20       | 0.020           | 2.9     |

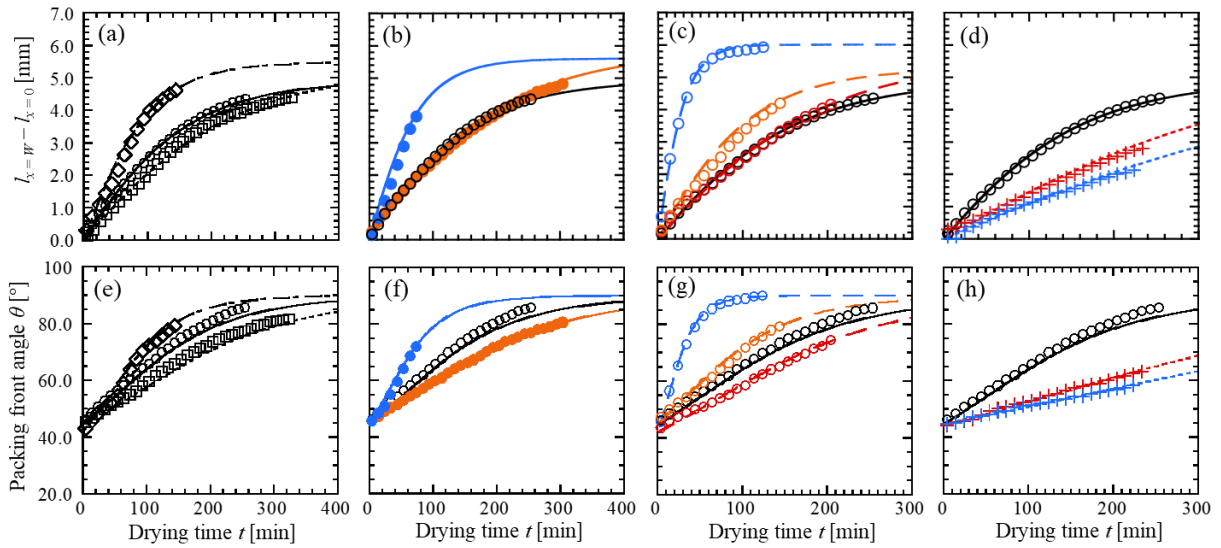

Figure S1 Time evolution of (a–d)  $l_x = w - l_{x=0}$  (e–h)  $\theta$  for a series of experiments listed in Table S1 whereas the lines show mathematical models calculated from Eq. (5) and (7). (a, d)  $H = 0.05$  mm (black open diamonds and black chain line) and  $0.2$  mm (black open squares and black dotted line). (b, f)  $T = 5$  °C (orange solid circles and orange solid line) and  $40$  °C (blue solid circles and blue solid line). (c, g)  $d = 62$  nm (Snowtex-OL, orange open circles and orange broken line),  $98$  nm (KE-W10, red open circles and red broken line) and  $2.9 \times 10^2$  nm (MP-2040, blue open circles and blue broken line). (d, h)  $\varphi_0 = 0.033$  (red plus signs and red dotted line) and  $0.020$  (blue plus signs and blue dotted line). Black open circles and black solid line in each figure show the experimental results and the model calculations at the standard condition ( $H = 0.1$  mm,  $T = 20$  °C,  $d = 3.3 \times 10^2$  nm and  $\varphi_0 = 0.10$ ). In the model calculation,  $A$  in Table S1 is used for each calculation.

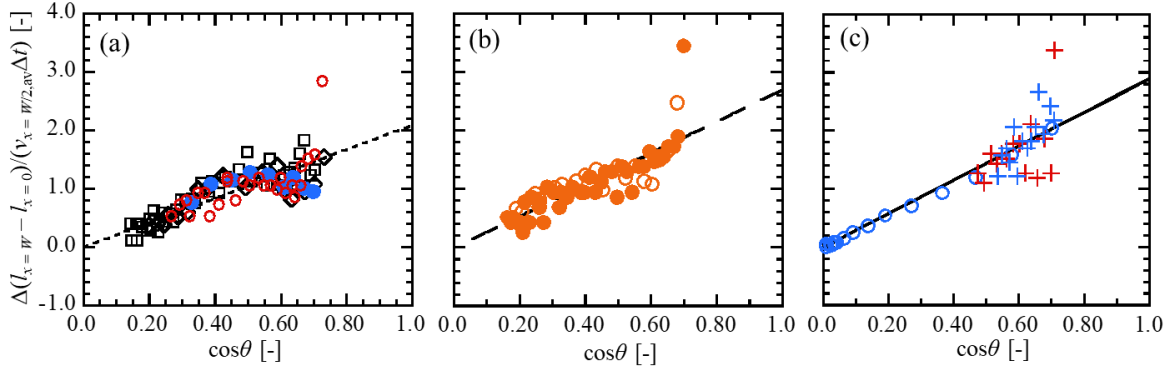

Figure S2 Normalized  $\Delta(l_{x=w} - l_{x=0})/\Delta t$  by  $v_{x=w/2,av}$  in terms of  $\cos\theta$  for the data in Fig. S1. Time interval  $\Delta t$  is set to be 16 min for the samples of  $\varphi_0 = 0.033$  and 0.020, and 8 min for the other samples. Each symbol corresponds to that in Fig. S1 and these data are summarized by different  $A$  values as listed in Table S1. (a) Samples of  $H = 0.05$  mm (black open diamonds),  $H = 0.2$  mm (black open squares),  $T = 40$  °C (blue solid circles) and  $d = 98$  nm (red open circles). (b) Samples of  $T = 5$  °C (orange solid circles) and  $d = 62$  nm (orange open circles). (c) Samples of  $d = 2.9 \times 10^2$  nm (blue open circles),  $\varphi_0 = 0.033$  (red plus sign) and  $\varphi_0 = 0.020$  (blue plus sign). Dotted, broken, and solid lines in (a), (b), and (c) correspond to Eq. (3) in which  $A$  is set to be 2.1, 2.7, and 2.9, respectively.

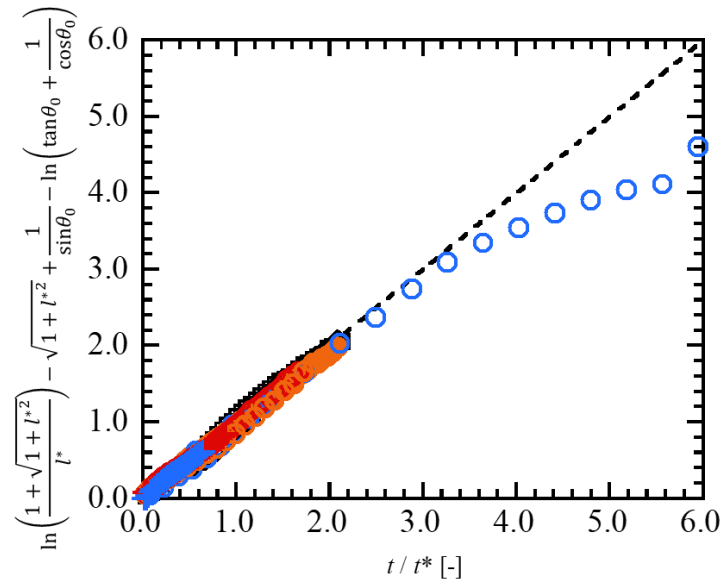

Figure S3 Correlation between the left-hand and right-hand sides in Eq. (5) calculated from the experimental data in Fig. S1(a-d). Dotted line indicates the theoretical line expressing Eq. (5). Each symbol corresponds to that in Fig. S1 and  $A$  is set for each drying experiment as listed in Table S1.

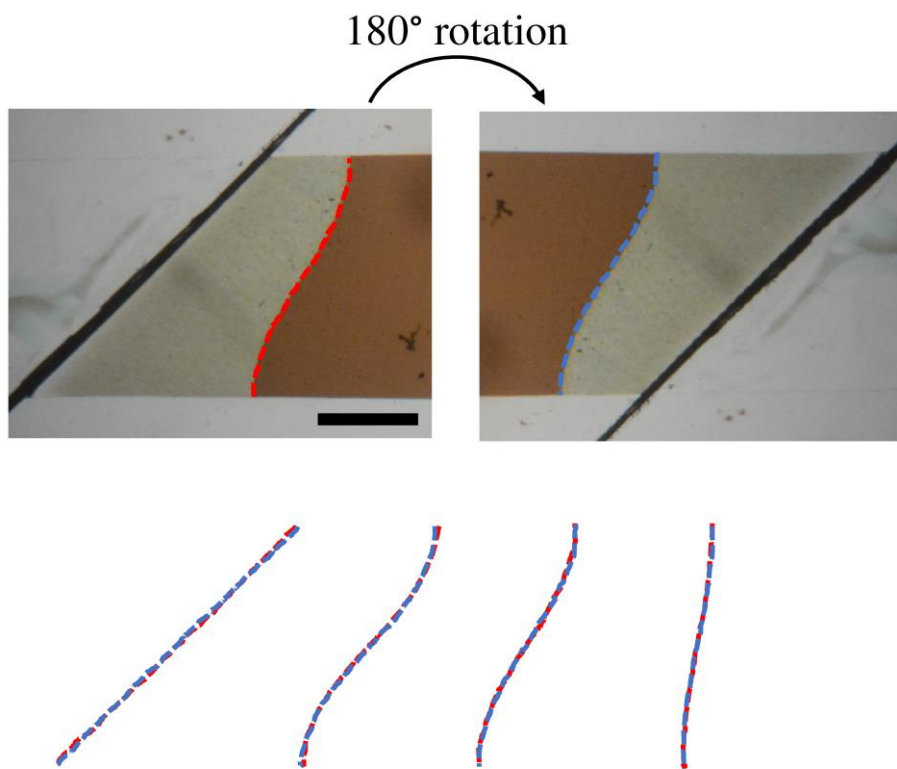

Figure S4 (Top) Shape of packing front at  $t = 120$  min before (red dotted line) and after rotation (blue dotted line) by  $180^\circ$ . The drying interface of the cell,  $\theta_0$ , was set as  $45^\circ$ . Scale bar shows 2 mm. (Bottom) Superimposition of the two dotted lines at  $t = 0, 80, 120, 240$  (Left to right).

### Movie S1

Growth of the packed film in the drying cell in which the drying interface is set to be perpendicular to spacers ( $\theta_0 = 92^\circ$ ). 0.1 s in the movie corresponds to 1 min in real observation.

### Movie S2

Growth of the packed film in the drying cell in which the drying interface is set to be tilted with an angle of  $45^\circ$  to the spacer ( $\theta_0 = 45^\circ$ ). 0.1 s in the movie corresponds to 1 min in real observation.
